# Supplementary material
Source: PubMed Central journal article supplement (PMC3442223)
Supplement: mmc1.pdf [file mmc1.pdf]

# THE LANCET

## **Supplementary appendix**

This appendix formed part of the original submission and has been peer reviewed. We post it as supplied by the authors.

Supplement to: Fairall L, Bachmann MO, Lombard C, et al. Task shifting of antiretroviral treatment from doctors to primary-care nurses in South Africa (STRETCH): a pragmatic, parallel, cluster-randomised trial. *Lancet* 2012; published online Aug 15. [http://dx.doi.org/10.1016/S0140-6736\(12\)60730-2](http://dx.doi.org/10.1016/S0140-6736(12)60730-2).

## Appendix

**Table 1. Components of the intervention compared to model of care at control clinics**

| Component                      | Intervention clinics                                                                                                                                                                                                                                                                                                                                                                                                                                                                                                                                                                                                                                                                                                                                                                                                                                                                                                                                                                                                                                                                                                                                                               | Control clinics                                                                                                                                                                                                                        |
|--------------------------------|------------------------------------------------------------------------------------------------------------------------------------------------------------------------------------------------------------------------------------------------------------------------------------------------------------------------------------------------------------------------------------------------------------------------------------------------------------------------------------------------------------------------------------------------------------------------------------------------------------------------------------------------------------------------------------------------------------------------------------------------------------------------------------------------------------------------------------------------------------------------------------------------------------------------------------------------------------------------------------------------------------------------------------------------------------------------------------------------------------------------------------------------------------------------------------|----------------------------------------------------------------------------------------------------------------------------------------------------------------------------------------------------------------------------------------|
| Patient management guidelines  | <p>STRETCH edition of the PALSALUS* guidelines with algorithms for starting and monitoring ART.</p> <p>Patients were eligible for ART if:</p> <ul style="list-style-type: none"> <li>• CD 4 count <math>\leq</math>200 cells per <math>\mu</math>L or</li> <li>• Stage IV infection (AIDS) or</li> <li>• Pregnant with CD4 count <math>\leq</math>350 cells per <math>\mu</math>L</li> </ul> <p>Patients were eligible for nurse initiation of ART if:</p> <ul style="list-style-type: none"> <li>• CD4 count 51-200 cells per <math>\mu</math>L</li> <li>• No Stage IV infection (AIDS)</li> <li>• No previous ART <math>\geq</math> 1 month</li> <li>• Not bed- or wheelchair bound</li> <li>• Not using drugs other than cotrimoxazole or vitamins</li> <li>• Weight <math>&gt;</math>40kg and BMI <math>&lt;</math>28</li> </ul> <p>Patients were eligible for nurse re-prescription of ART if:</p> <ul style="list-style-type: none"> <li>• Undetectable viral load</li> <li>• No severe side-effects</li> <li>• No new opportunistic infections</li> </ul> <p>Patients not fulfilling these criteria were referred to a doctor for initiation or re-prescription of ART.</p> | <p>PALSALUS guidelines covering the management of HIV/AIDS, sexually transmitted infections and tuberculosis.</p> <p>Eligibility criteria for ART were the same, but all ART was to be initiated and/or re-prescribed by a doctor.</p> |
| Nurse training                 | <p>Educational outreach training in PALSALUS</p> <p>Educational outreach training in the use of STRETCH edition of the PALSALUS guidelines:</p> <ul style="list-style-type: none"> <li>• Median of 4 sessions to all nurses (n=128) at the clinic</li> <li>• Sessions delivered by 16 PALSALUS trainers prepared for STRETCH during 2.5 day training</li> </ul>                                                                                                                                                                                                                                                                                                                                                                                                                                                                                                                                                                                                                                                                                                                                                                                                                    | <p>Educational outreach training in PALSALUS</p> <p>No STRETCH educational outreach</p>                                                                                                                                                |
| ART prescribing and dispensing | <p>ART prescribers:</p> <ul style="list-style-type: none"> <li>• Doctors and</li> <li>• Professional nurses who completed STRETCH training (n=104)</li> </ul> <p>ART dispensed by pharmacists and pharmacy assistants</p> <p>Dispensed drugs given to patients by nurses</p>                                                                                                                                                                                                                                                                                                                                                                                                                                                                                                                                                                                                                                                                                                                                                                                                                                                                                                       | <p>ART prescribers:</p> <ul style="list-style-type: none"> <li>• Doctors only</li> </ul> <p>ART dispensed by pharmacists and pharmacy assistants</p> <p>Dispensed drugs given to patients by nurses</p>                                |
| Management support             | <p>Establishment of a STRETCH team at each facility</p> <ul style="list-style-type: none"> <li>• Led by the facility manager</li> <li>• Included doctors nurses, pharmacists, local managers, clerks, community health workers</li> <li>• Managed changes during the intervention including ART drugs delivery to clinics, ensuring supplies of blood tubes and forms, and setting up communication infrastructure enabling nurses to contact doctors, and clinics to contact pharmacists.</li> <li>• Implementation Toolkit – 30 page manual describing new staff roles, phases of the intervention, tips of dealing with anticipated problems, contact details for managers and letters authorising nurse prescribing</li> </ul>                                                                                                                                                                                                                                                                                                                                                                                                                                                 | <p>Standard management support by a facility manager and district ART co-ordinator</p>                                                                                                                                                 |
| Phased introduction            | <p>Phase 1: STRETCH educational outreach training &amp; establishment of STRETCH team at facility (median of 1 month, range 1-9 months)</p> <p>Phase 2: Nurses assumed responsibility for repeating ART prescriptions in stable patients (median of 3.5 months, range 1-35 months)</p> <p>Phase 3: Nurses assumed responsibility for initiating ART in selected patients (median of 30.5 months, range 0-32 months)</p>                                                                                                                                                                                                                                                                                                                                                                                                                                                                                                                                                                                                                                                                                                                                                            | <p>Not applicable</p>                                                                                                                                                                                                                  |

\* PALSALUS: Practical Approach to Lung Health and HIV/AIDS in South Africa

**Table 2: Characteristics of clinics at time of allocation to intervention and control groups**

| <b>Characteristic</b>                                       | <b>Intervention group</b> | <b>Control group</b>     |
|-------------------------------------------------------------|---------------------------|--------------------------|
| No. of clinics                                              | 16                        | 15                       |
| No. of clinics per stratum. Median (range).                 | 2 (1-4)                   | 2 (1-3)                  |
| No. adult attendances in previous year (2007). Median (IQR) | 40183<br>(12,079-89,302)  | 30062<br>(17,651-93,631) |
| No nurses per clinic in previous year (2007). Median (IQR). | 6 (4-18)                  | 6 (3-16)                 |
| Doctor support for ART initiations available at clinic      |                           |                          |
| All the time                                                | 2/16 (12.5%)              | 3/15 (20.0%)             |
| On a sessional basis                                        | 3/16 (18.8%)              | 5/15 (33.3%)             |
| Not available                                               | 11/16 (68.8%)             | 7/15 (46.7%)             |
| Pharmacy staff situated on-site                             | 7/16 (43.8%)              | 6/15 (40.0%)             |
| Distance from referral treatment site (km). Median (IQR).   | 7.4 (0-54)                | 10.9 (0-57)              |
| Electronic medical record system in place                   | 14/16 (87.5%)             | 13/15 (86.7%)            |

**Table 3. Cohort 1: Hazard ratios of the associations of arm and patient level characteristics with time to death: Cox proportional hazards model**

| Factor                               | N (%)       | Hazard Ratio (95% CI)* |
|--------------------------------------|-------------|------------------------|
| <i>Arm of trial</i>                  |             |                        |
| Control                              | 3862 (41.7) | 1 (reference)          |
| Intervention                         | 5390 (58.3) | 0.92 (0.76 – 1.12)     |
| <i>Patient characteristics</i>       |             |                        |
| Sex                                  |             |                        |
| Female                               | 6285 (67.9) | 1 (reference)          |
| Male                                 | 2967 (32.1) | 1.30 (1.19 – 1.43)     |
| Age at enrolment                     |             |                        |
| 16-24 years                          | 772 (8.3)   | 1 (reference)          |
| 25-34 years                          | 3429 (37.1) | 1.32 (1.01 – 1.72)     |
| 35-44 years                          | 3162 (34.2) | 1.40 (1.05 – 1.85)     |
| 45-54 years                          | 1477 (16.0) | 1.55 (1.14 – 2.11)     |
| ≥55 years                            | 412 (4.5)   | 2.04 (1.53 – 2.71)     |
| CD4 at enrolment (cells per $\mu$ L) |             |                        |
| ≤100                                 | 3314 (35.8) | 4.59 (3.84 – 5.47)     |
| 101-200                              | 3680 (39.8) | 1.84 (1.53 – 2.22)     |
| 201-350                              | 2258 (24.4) | 1 (reference)          |
| Presence of ID number                |             |                        |
| Not available                        | 1301 (14.1) | 1 (reference)          |
| Available                            | 7951 (85.9) | 2.05 (1.16 – 3.63)     |
| Started antiretroviral treatment†    | 6130 (66.3) | 0.54 (0.42 – 0.68)     |

\* Mutually adjusted for all characteristics in the table and for randomisation strata and intra-cluster correlation of outcomes. † Time-varying covariate.

**Table 4. Cohort 2: Risk differences of the associations of arm and patient level characteristics with viral load suppression: binomial regression model**

| <b>Factor</b>                  | <b>N (%)</b> | <b>Risk difference (95% CI)*</b> |
|--------------------------------|--------------|----------------------------------|
| <b>Arm of trial</b>            |              |                                  |
| Control                        | 3202 (51.4)  | 0% (reference)                   |
| Intervention                   | 3029 (48.6)  | 1.1% (-2.3, 4.6)                 |
| <b>Patient characteristics</b> |              |                                  |
| <b>Sex</b>                     |              |                                  |
| Female                         | 4445 (71.3)  | 0% (reference)                   |
| Male                           | 1786 (28.7)  | -9.4% (-12.0, -6.7)              |
| <b>Age at enrolment</b>        |              |                                  |
| 16-24 years                    | 217 (3.5)    | 0% (reference)                   |
| 25-34 years                    | 1934 (31.0)  | 3.8% (-1.4, 9.0)                 |
| 35-44 years                    | 2543 (40.8)  | 8.6% (4.3, 12.8)                 |
| 45-54 years                    | 1191 (19.1)  | 11.6% (7.3, 16.0)                |
| ≥55 years                      | 346 (5.6)    | 7.9% (2.8, 13.0)                 |
| <b>Presence of ID number</b>   |              |                                  |
| Not available                  | 414 (6.6)    | 0% (reference)                   |
| Available                      | 5817 (93.4)  | 8.8% (4.0, 13.5)                 |

\* Mutually adjusted for all characteristics in the table and for randomisation strata and intra-cluster correlation of outcomes.

**Table 5. Healthcare utilisation**

| Outcome                        | Intervention group |      | Control group |       | Incidence rate ratio* | 95% CI     | p value | Intraclass correlation coefficient |
|--------------------------------|--------------------|------|---------------|-------|-----------------------|------------|---------|------------------------------------|
|                                | Mean               | SD   | Mean          | SD    |                       |            |         |                                    |
| <b>Cohort 1</b>                |                    |      |               |       |                       |            |         |                                    |
| No. clinic visits with nurse   | 8.49               | 7.32 | 6.63          | 6.63  | 1.29                  | 1.0, 1.67  | 0.054   | 0.223                              |
| No. clinic visits with doctor  | 2.09               | 2.40 | 0.93          | 1.72  | 2.11                  | 1.05, 4.25 | 0.035   | 0.353                              |
| No. hospital admissions        | 0.19               | 0.54 | 0.19          | 0.53  | 0.86                  | 0.80, 0.96 | 0.005   | 0.036                              |
| No. inpatient days             | 1.03               | 3.77 | 0.98          | 3.59  | 0.87                  | 0.84, 0.91 | <0.001  | 0.019                              |
| <b>Cohort 2</b>                |                    |      |               |       |                       |            |         |                                    |
| No. clinic visits with nurse*  | 10.83              | 6.58 | 8.97          | 5.600 | 1.24                  | 1.01, 1.53 | 0.048   | 0.445                              |
| No. clinic visits with doctor* | 1.64               | 1.97 | 1.92          | 1.78  | 0.79                  | 0.53, 1.17 | 0.236   | 0.606                              |
| No. hospital admissions†       | 0.08               | 0.37 | 0.09          | 0.43  | 0.91                  | 0.64, 1.30 | 0.615   | 0.018                              |
| No. inpatient days†            | 0.47               | 2.38 | 0.47          | 3.58  | 0.86                  | 0.58, 1.29 | 0.474   | 0.010                              |

SD standard deviation. \* Poisson regression models adjusted for intra-cluster correlation of outcomes, randomisation strata and duration enrolled in the trial.
